# Supplementary material for: Complete genome sequence analysis of human echovirus 30 isolated during a large outbreak in Guangdong Province of China, in 2012
Source: PubMed Central journal article supplement (PMC3906529; doi:10.1007/s00705-013-1818-0), 2013-08-29
Supplement: 705_2013_1818_MOESM1_ESM.pdf [file 705_2013_1818_MOESM1_ESM.pdf]

## Supplements Table 1

Table 1 Specific primers for PCR of 2012EM161 Echovirus 30 strain

| primers | sequence                   | position  |
|---------|----------------------------|-----------|
| 1F      | TTAAAACAGCCTGTGGGTT        | 1-19      |
| 1R1     | TTCAATTGTCACCATAAGCAG      | 584-604   |
| 1R      | GATCTTGAGTGAAATCTTGCC      | 869-889   |
| 2F      | AGCGGAACCGACTACTTT         | 534-551   |
| 2R      | GCCTGCGTTATGGACTGC         | 1453-1470 |
| 3F      | CGGTCAAGCAATGGAGTT         | 1395-1412 |
| 3R      | GTAGCCCGCATCAGTGTA         | 2281-2298 |
| 4F      | ACGTTGGCTTACAATCCAGC       | 2201-2220 |
| 4R      | CCGAGACTCAGTCACTCCTTG      | 3253-3273 |
| 5F      | ACAGCGTTGCTCGCGTCTA        | 3146-3164 |
| 5R      | GCGTTGGTCATCTCCGTGAA       | 4090-4109 |
| 6F      | TACTACGGAATCCCCATGGC       | 4039-4058 |
| 6R      | TCTGTGGTTGTA TCCCTGAACAT   | 4996-5019 |
| 7F      | ACATTGAAGTTATCTCCATGTACAG  | 4808-4832 |
| 7R      | CGGCTTCCATCATGTA CTCA TC   | 6148-6169 |
| 8F1     | AGTGTGGTGGTGTCTGATGTC      | 5825-5846 |
| 8F2     | GAACCAGCGGTGCTAAGGAACG     | 6052-6073 |
| 9F      | AACTACATAGATTACTTATGCAACTC | 6727-6752 |

## Supplementary Table 2

Table 2. the accession number of VP1 sequences for the phylogenetic tree construction

|                   |          |          |          |          |          |
|-------------------|----------|----------|----------|----------|----------|
| E21-AY302547      | AF128080 | AF236574 | AY371473 | FJ868361 | JX129832 |
| E30-present study | AF128081 | AF236575 | AY371479 | FJ919565 | JX129833 |
| AF081340          | AF128087 | AF236577 | AY371481 | GQ329836 | JX129834 |
| AF081341          | AF128090 | AF236578 | AY665608 | GQ329838 | JX129835 |
| AF127984          | AF152866 | AF311938 | AY695092 | GQ352377 | JX129836 |
| AF127988          | AF152868 | AJ133658 | AY695094 | GU142904 | JX129837 |
| AF127989          | AF152871 | AJ133659 | AY695095 | HQ436346 | JX129838 |
| AF127991          | AF152875 | AJ133660 | AY695101 | HQ436347 | JX129839 |
| AF127994          | AF152876 | AJ241448 | AY695102 | HQ625643 | JX129840 |
| AF127995          | AF152879 | AJ241453 | AY695103 | HQ625644 | JX129841 |
| AF127999          | AF152880 | AJ241456 | AY695105 | HQ625649 | JX129842 |
| AF128001          | AF152881 | AJ276813 | AY695106 | JN177727 | JX129843 |
| AF128003          | AF152882 | AJ276815 | AY695107 | JN203946 | JX129844 |
| AF128006          | AF152884 | AJ430699 | AY879317 | JN203948 | JX129845 |
| AF128008          | AF152886 | AJ430700 | AY879319 | JN203949 | JX129846 |
| AF128011          | AF152887 | AJ430701 | AY879322 | JN203957 | JX129847 |
| AF128018          | AF152888 | AJ430703 | AY879324 | JN704615 | JX129848 |
| AF128020          | AF152891 | AJ430704 | AY879326 | JN797614 | JX129849 |
| AF128021          | AF162711 | AJ430705 | AY948442 | JN797616 | JX129850 |
| AF128023          | AF236517 | AM236607 | DQ118682 | JX129810 | JX129851 |
| AF128025          | AF236518 | AM236610 | DQ118694 | JX129811 | JX129852 |
| AF128027          | AF236519 | AM236612 | DQ246620 | JX129812 | JX129853 |
| AF128028          | AF236520 | AM236619 | DQ534205 | JX129813 | JX129854 |
| AF128029          | AF236523 | AM236989 | DQ842246 | JX129814 | JX129861 |
| AF128030          | AF236524 | AM236990 | DQ842249 | JX129815 | JX129863 |
| AF128031          | AF236531 | AM710997 | DQ842256 | JX129816 | JX129866 |
| AF128032          | AF236532 | AM711007 | DQ842261 | JX129817 | JX129870 |
| AF128036          | AF236536 | AM711027 | DQ842263 | JX129818 | JX129873 |
| AF128037          | AF236540 | AM711030 | DQ842264 | JX129819 | JX129874 |
| AF128039          | AF236542 | AM946155 | EF066391 | JX129820 | JX129875 |
| AF128040          | AF236548 | AM946168 | EF066392 | JX129821 | JX129876 |
| AF128042          | AF236549 | AM946175 | EF397655 | JX129822 | JX129877 |
| AF128055          | AF236550 | AY146073 | EF397656 | JX129823 | JX129878 |
| AF128061          | AF236552 | AY146076 | EU004586 | JX129824 | JX129879 |
| AF128063          | AF236556 | AY146080 | EU004588 | JX129825 | JX129880 |
| AF128064          | AF236557 | AY146081 | EU280291 | JX129826 | JX129881 |
| AF128068          | AF236560 | AY146082 | EU280298 | JX129827 | JX129882 |
| AF128069          | AF236562 | AY146084 | EU293769 | JX129828 | JX129883 |
| AF128072          | AF236563 | AY371457 | EU293774 | JX129829 | JX513544 |
| AF128075          | AF236565 | AY371460 | EU293777 | JX129830 | JX854435 |
| AF128078          | AF236573 | AY371462 | EU293778 | JX129831 | JX976773 |

Supplement table 3.

Table 3. the accession number of genome sequences for the phylogenetic tree construction

---

|                   |              |
|-------------------|--------------|
| E30-present study | E30-AY948442 |
| CA9-JQ837914      | E30-DQ246620 |
| E11-AJ577590      | E30-DQ534205 |
| E11-AJ577594      | E30-EF066391 |
| E11-X80059        | E30-EF066392 |
| E12-X79047        | E30-JN704615 |
| E13-AY302539      | E30-JN797614 |
| E14-AY302540      | E30-JN797616 |
| E15-AY302541      | E30-JX854435 |
| E16-AY302542      | E30-JX976773 |
| E17-AY302543      | E31-AY302554 |
| E18-AF317694      | E32-AY302555 |
| E18-AY302544      | E32-AY302556 |
| E19-AY167107      | E3-AY302553  |
| E1-AF029859       | E4-AY302557  |
| E20-AY302546      | E4-FJ172447  |
| E21-AY302547      | E5-AF083069  |
| E24-AY302548      | E6-AY302558  |
| E25-AY302549      | E6-E6U16283  |
| E26-AY302550      | E6-JX976771  |
| E27-AY302551      | E7-AY036578  |
| E29-AY302552      | E7-AY036579  |
| E2-AY302545       | E7-AY302559  |
| E30-AF162711      | E9-AF524867  |
| E30-AF311938      | E9-X92886    |
| E30-AY896766      | SVDV-D00435  |
| E30-AY896767      |              |

---
